# Supplementary material for: Synthesis and photovoltaic property of fine and uniform Zn2SnO4nanoparticles
Source: Royal Society of Chemistry journal article supplement (doi:10.1039/c1nr11063b), 2011-12-01
Supplement: c1nr11063b.pdf [file c1nr11063b.pdf]

## Electronic Supplementary Information (ESI)

### Synthesis and photovoltaic property of fine and uniform $\text{Zn}_2\text{SnO}_4$ nanoparticles

Dong Wook Kim,<sup>ab</sup> Seong Sik Shin,<sup>b</sup> In Sun Cho,<sup>\*c</sup> Sangwook Lee,<sup>ab</sup> Dong Hoe Kim,<sup>b</sup> Chan  
Woo Lee,<sup>b</sup> Hyun Suk Jung<sup>d</sup> and Kug Sun Hong<sup>\*ab</sup>

<sup>a</sup>Research Institute of Advanced Materials (RIAM), Seoul National University, Seoul 151-744,  
Korea, <sup>b</sup>Department of Materials Science and Engineering, Seoul National University, Seoul  
151-744, Korea, <sup>c</sup>Department of Mechanical Engineering, Stanford University, Stanford,  
California 94305, USA, <sup>d</sup>School of Advanced Materials Science and Engineering, Sung Kyun  
Kwan University, Suwon 440-746, Korea

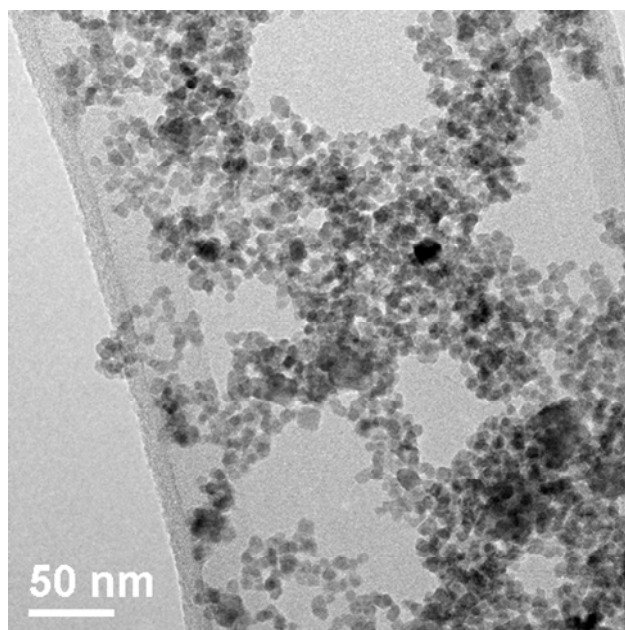

**Fig. S1** Low magnified TEM image of  $\text{Zn}_2\text{SnO}_4$  nanoparticles (NPs) that was synthesized by a hydrothermal reaction with ammonium carbonate (AC) addition as much as the AC/Zn mole ratio of 0.5 at 180 °C for 12 h.

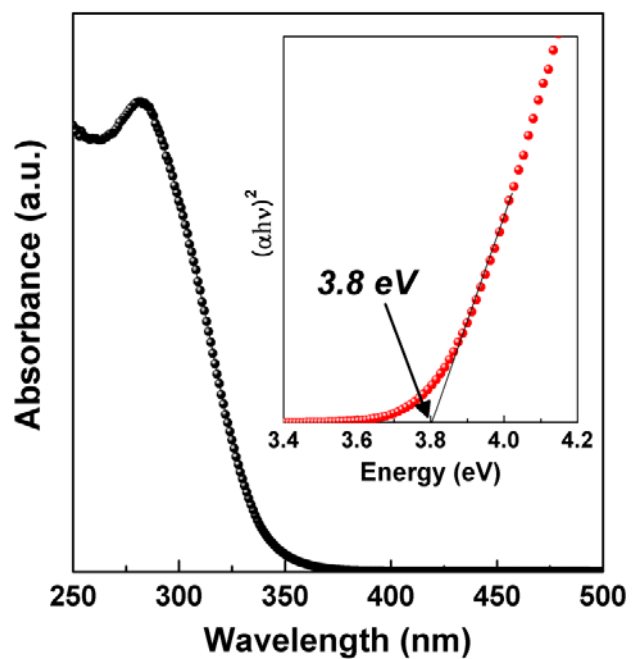

**Fig. S2** Optical absorption spectrum of Zn<sub>2</sub>SnO<sub>4</sub> NPs; inset, corresponding band gap determination.

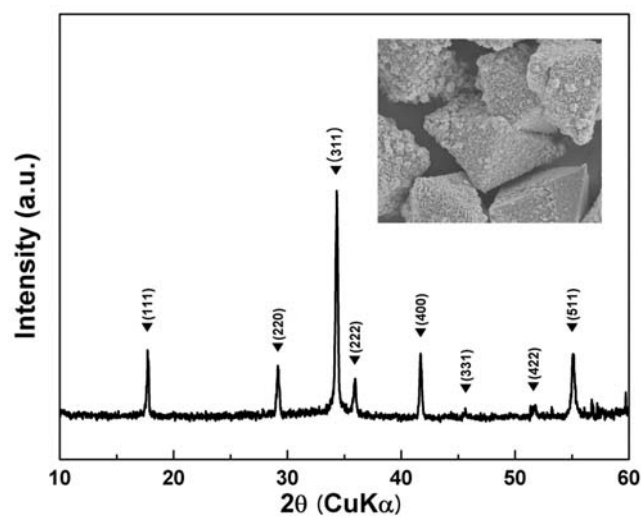

**Fig. S3** XRD pattern and SEM image Zn<sub>2</sub>SnO<sub>4</sub> powder synthesized by a hydrothermal reaction without AC addition at 200 °C for 12 h.

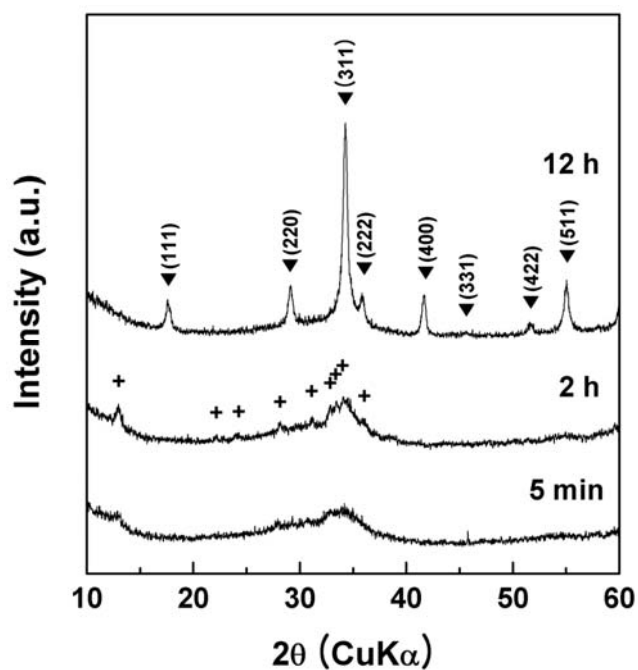

**Fig. S4** XRD patterns of the powders prepared by reaction time-controlled experiments. All the diffraction peaks of powder obtained at a reaction time of 12 h are indexed to a cubic  $\text{Zn}_2\text{SnO}_4$  (JCPDS No. 24-1470).

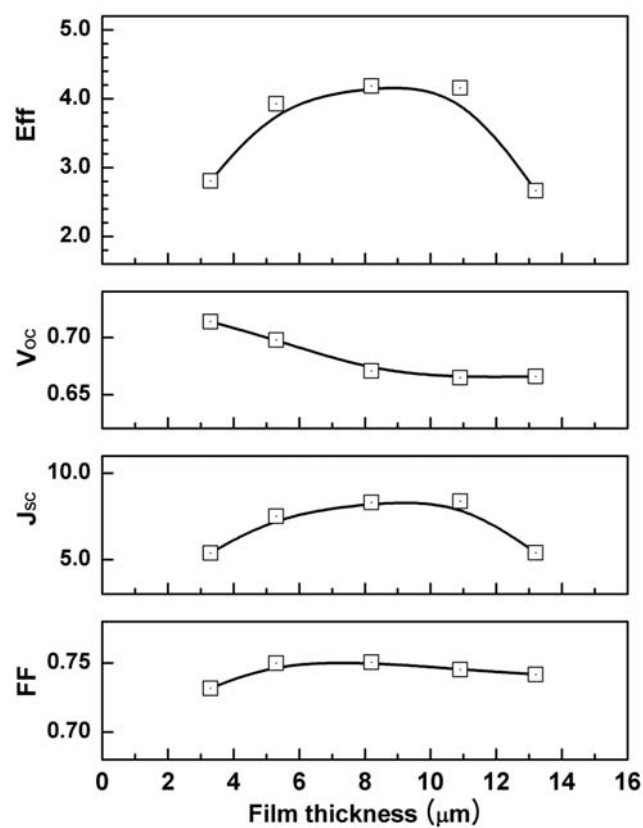

**Fig. S5** J-V characteristics of the DSSCs employing Zn<sub>2</sub>SnO<sub>4</sub> NP films as a function of film thickness.

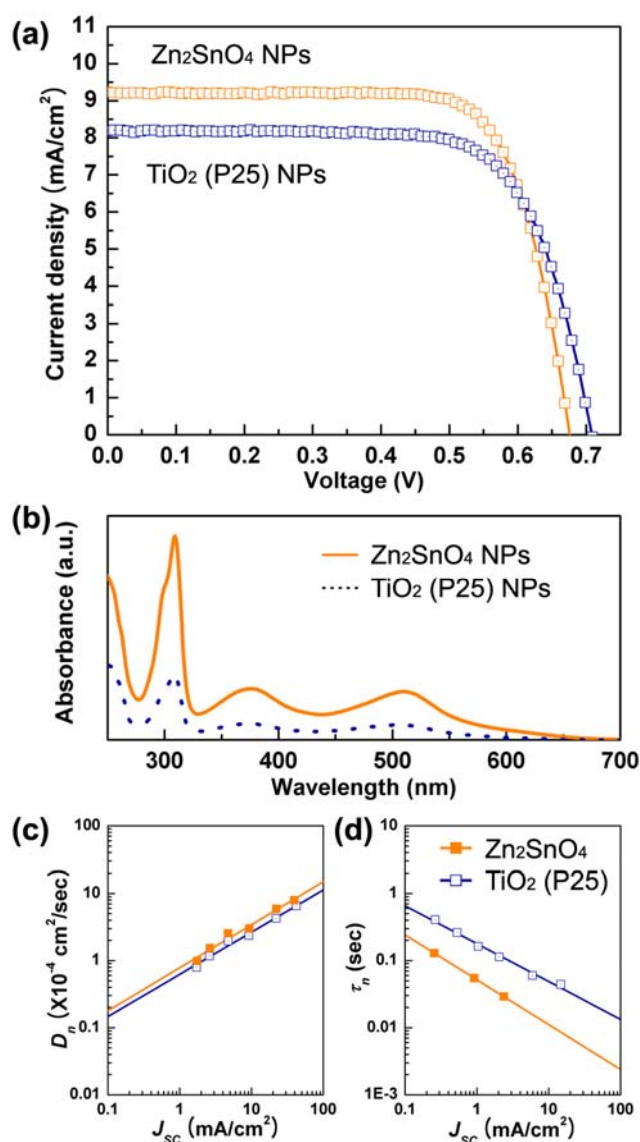

**Fig. S6** Comparative studies of photovoltaic properties with DSSCs employing the ultra-fine Zn<sub>2</sub>SnO<sub>4</sub> NPs and the commercial TiO<sub>2</sub> NPs (P25). (a) Photocurrent density-voltage ( $J$ - $V$ ) characteristics of DSSCs, (b) optical absorption spectra of the desorbed dye molecules from the Zn<sub>2</sub>SnO<sub>4</sub> and TiO<sub>2</sub> photoelectrodes, and (c) Electron diffusion coefficients ( $D_n$ ) and (d) lifetimes ( $\tau_n$ ) as a function of short circuit current ( $J_{sc}$ ) that is obtained by the stepped light-induced transient measurements of photocurrent and photovoltage (SLIM-PCV)<sup>1</sup>.

- 1 S. Nakade, T. Kanzaki and Y. Wada, S. Yanagida, *Langmuir*, 2005, **21**, 10803.
